# Supplementary material
Source: PubMed Central journal article supplement (PMC3087819)
Supplement: NIHMS284825-supplement-Supplemental_Figure_1.pdf [file NIHMS284825-supplement-Supplemental_Figure_1.pdf]

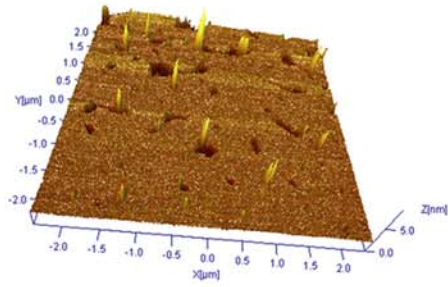

**Supplemental Figure 1.** Atomic Force Microscopy of a 10 mol% DNP-lipid bilayer at 37°C. Bilayer thickness is approximately 3 nm. Signal spikes are thought to represent DNP molecules.
