# Supplementary material
Source: PubMed Central journal article supplement (PMC3087819)
Supplement: NIHMS284825-supplement-Supplemental_Figure_2.pdf [file NIHMS284825-supplement-Supplemental_Figure_2.pdf]

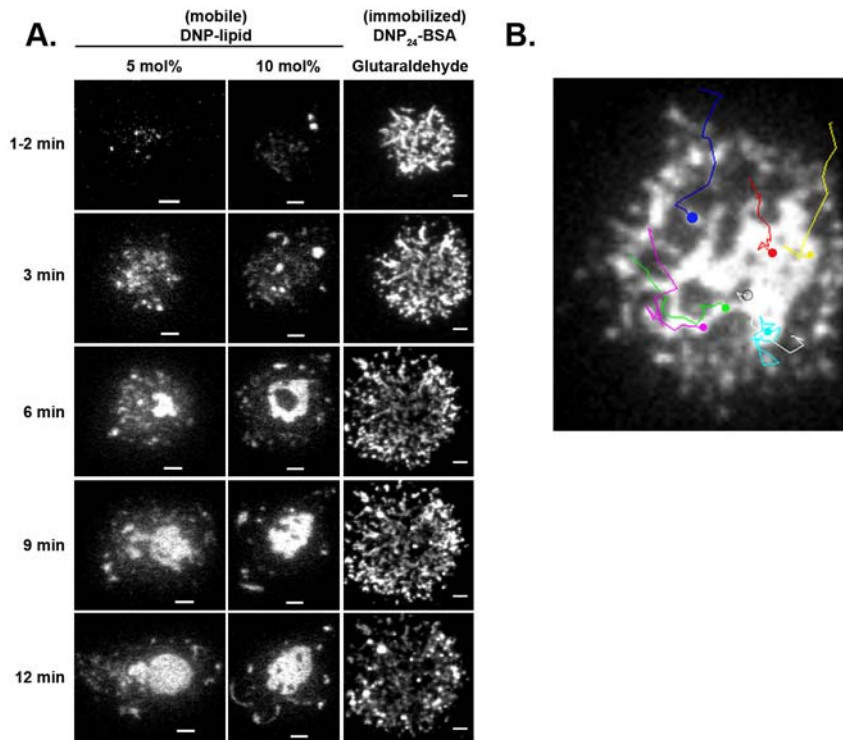

**Supplementary Figure 2.** *A.* Additional surfaces presenting mobile and immobilized DNP. TIRF images of fluorescent IgE-primed cells engaged with 5 mol% (left column) or 10 mol% (middle column) DNP-lipid bilayers, or glutaraldehyde immobilized DNP<sub>24</sub>-BSA. Images were taken over a 12 minute period and grayscale intensities were separately enhanced. Scale bars are 5  $\mu$ m. *B.* Tracks of receptor clusters over time in the contacting membrane of the cell seen in Supplementary Movie 1. Colored circles indicate end points of each track.
