# Supplementary material
Source: PubMed Central journal article supplement (PMC3087819)
Supplement: NIHMS284825-supplement-Supplemental_Figure_3.pdf [file NIHMS284825-supplement-Supplemental_Figure_3.pdf]

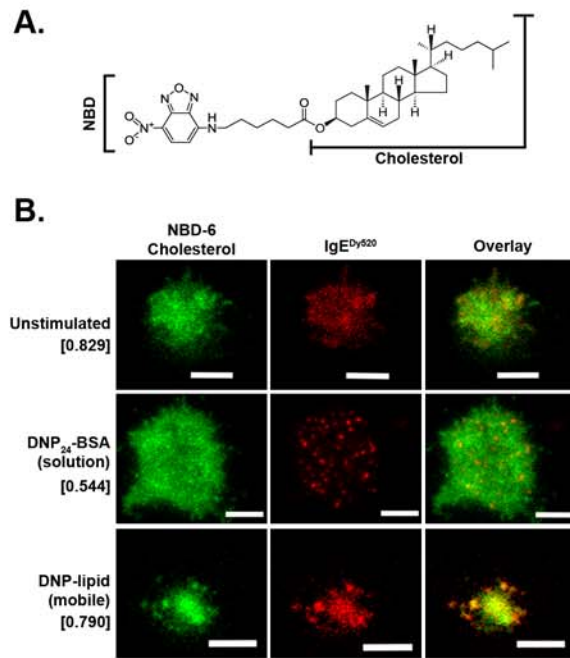

**Supplemental Figure 3.** NBD-6 cholesterol and synapse formation.  
 A. Structure of NBD-6 cholesterol.  
 B. TIRF images of IgE<sup>Dy520</sup>-primed RBL-2H3 cells on glass (top row), stimulated with DNP<sub>24</sub>-BSA in solution (middle row), or settled onto a 25 mol% DNP-lipid bilayer (bottom row). Pearson's coefficient calculation for each image series is bracketed. Image brightness and contrast has been enhanced for visualization. All scale bars are 5  $\mu$ m.
